# Supplementary material
Source: publisher figshare collection journal article supplement (https://gsapubs.figshare.com/ndownloader/files/26232098)
Supplement: Supplementary file 1 [file 26232098]

## Supplemental Material

**Figure S1.** (A) Boxplots of Mamoré River channel widths for the 31 Landsat scenes used in the study. The boxes represent the first, second, and third quartiles; the ends of the whiskers represent one and a half times the interquartile range. Dashed line is the median channel width (350.0 m) for all measurements; this is the value that was used to calculate the bar type index. (B) Boxplots of measured migration rates for the 30 time steps. The boxes represent the first, second, and third quartiles; the ends of the whiskers represent one and a half times the interquartile range. Dashed line represents 60.0 m/year, the value used to normalize migration rates in the bar type index calculation.

**Figure S2.** (A) Map of a segment of the Mamoré River in 1999. Yellow polygons show the locations of bar accretion between 1998 and 1999; blue centerline corresponds to 1998, and red centerline to 1999. Numbered zero-migration locations are shown as black dots and are the same as in (B). Arrows mark the counter-point bars. (B) Measured dimensionless curvatures, migration rates, and bar type indices along a segment of the Mamoré River (same as in (A)).

### List of animations

1. Time-lapse evolution of area 1. Mapped BTI values on left, uninterpreted false-color image on the right.
2. Time-lapse evolution of combined area 2 and 3 with mapped BTI values shown.
3. Time-lapse evolution of area 2. Mapped BTI values on left, uninterpreted false-color image on the right.
4. Time-lapse evolution of area 3. Mapped BTI values on left, uninterpreted false-color image on the right.

The banks and the centerlines of the Mamore River have been mapped in 31 Landsat 4, Landsat 5 and Landsat 8 scenes, spanning the years between 1986 and 2018. The following is a list of the product identifiers for these Landsat scenes:

LT05\_L1TP\_232070\_19860716\_20170217\_01\_T1  
LT05\_L1TP\_232070\_19870703\_20170212\_01\_T1  
LT05\_L1TP\_232070\_19880806\_20170207\_01\_T1  
LT05\_L1TP\_232070\_19890708\_20170202\_01\_T1  
LT05\_L1TP\_232070\_19900727\_20170129\_01\_T1  
LT05\_L1TP\_232070\_19910612\_20170126\_01\_T1  
LT04\_L1TP\_232070\_19920724\_20170122\_01\_T1  
LT05\_L1TP\_232070\_19930719\_20170118\_01\_T1  
LT05\_L1TP\_232070\_19940807\_20170112\_01\_T1  
LT05\_L1TP\_232070\_19950810\_20170107\_01\_T1  
LT05\_L1TP\_232070\_19960609\_20170104\_01\_T1

LT05\_L1TP\_232070\_19970714\_20161230\_01\_T1  
 LT05\_L1TP\_232070\_19980717\_20161223\_01\_T1  
 LT05\_L1TP\_232070\_19990720\_20161217\_01\_T1  
 LT05\_L1TP\_232070\_20000706\_20161214\_01\_T1  
 LT05\_L1TP\_232070\_20010725\_20161210\_01\_T1  
 LT05\_L1TP\_232070\_20030715\_20161205\_01\_T1  
 LT05\_L1TP\_232070\_20040701\_20161130\_01\_T1  
 LT05\_L1TP\_232070\_20050704\_20161126\_01\_T1  
 LT05\_L1TP\_232070\_20060723\_20161120\_01\_T1  
 LT05\_L1TP\_232070\_20070811\_20161111\_01\_T1  
 LT05\_L1TP\_232070\_20080712\_20161030\_01\_T1  
 LT05\_L1TP\_232070\_20090731\_20161022\_01\_T1  
 LT05\_L1TP\_232070\_20100702\_20161014\_01\_T1  
 LT05\_L1TP\_232070\_20110806\_20161009\_01\_T1  
 LC08\_L1TP\_232070\_20130710\_20170504\_01\_T1  
 LC08\_L1TP\_232070\_20140713\_20170421\_01\_T1  
 LC08\_L1TP\_232070\_20150801\_20170406\_01\_T1  
 LC08\_L1TP\_232070\_20160718\_20170323\_01\_T1  
 LC08\_L1TP\_232070\_20170721\_20170728\_01\_T1  
 LC08\_L1TP\_232070\_20180622\_20180623\_01\_RT

No scenes were used for 2002 and 2012, as none of the available images had the quality needed for the analysis.

Figure S1a shows the distribution of channel widths for each Landsat scene. Widths were measured at every 25 m along the channel, using an approach that relies on the ‘shapely’ Python package. The observed width variability is largely due to the variations in river stage; this width variability also has an influence on migration rate measurements. Migration rates are overestimated for time steps when there is a significant decrease in river stage; and underestimated for time steps when there is a relatively large increase in river stage (Fig. S1b). However, having scenes for almost every year was more important than the drawbacks of the variability due to stage variations, as this approach allowed us to map in detail the channel migration even in locations with very large migration rates. These locations often coincide with counter-point bars, the main focus of this study.

With the exception of time steps when the river stage increased significantly (marked with arrows in Fig. S1a), measured migration rates tend to mimic the along-channel curvature, with a downstream phase lag (Fig. S2).

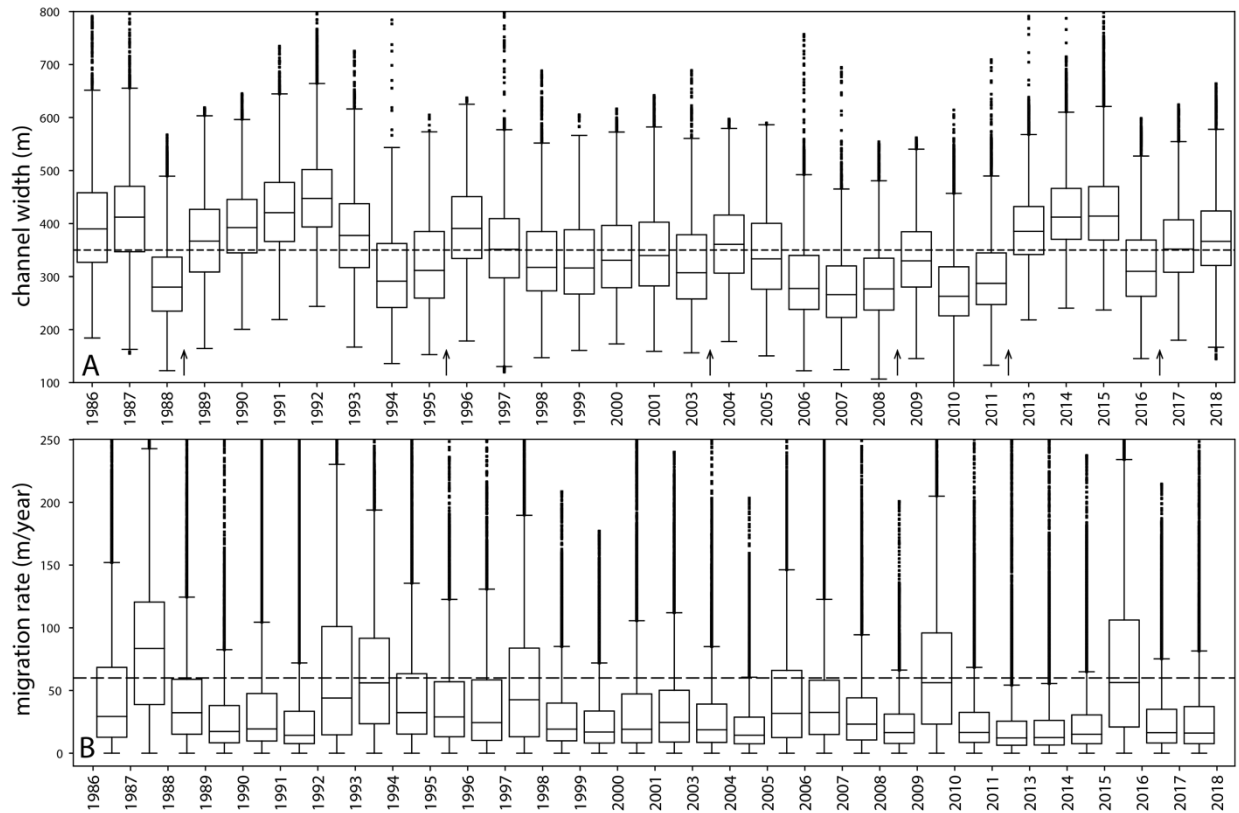

**Figure S1.** (A) Boxplots of Mamoré River channel widths for the 31 Landsat scenes used in the study. The boxes represent the first, second, and third quartiles; the ends of the whiskers represent one and a half times the interquartile range. Dashed line is the median channel width (350.0 m) for all measurements; this is the value that was used to calculate the bar type index. (B) Boxplots of measured migration rates for the 30 time steps. The boxes represent the first, second, and third quartiles; the ends of the whiskers represent one and a half times the interquartile range. Dashed line represents 60.0 m/year, the value used to normalize migration rates in the bar type index calculation.

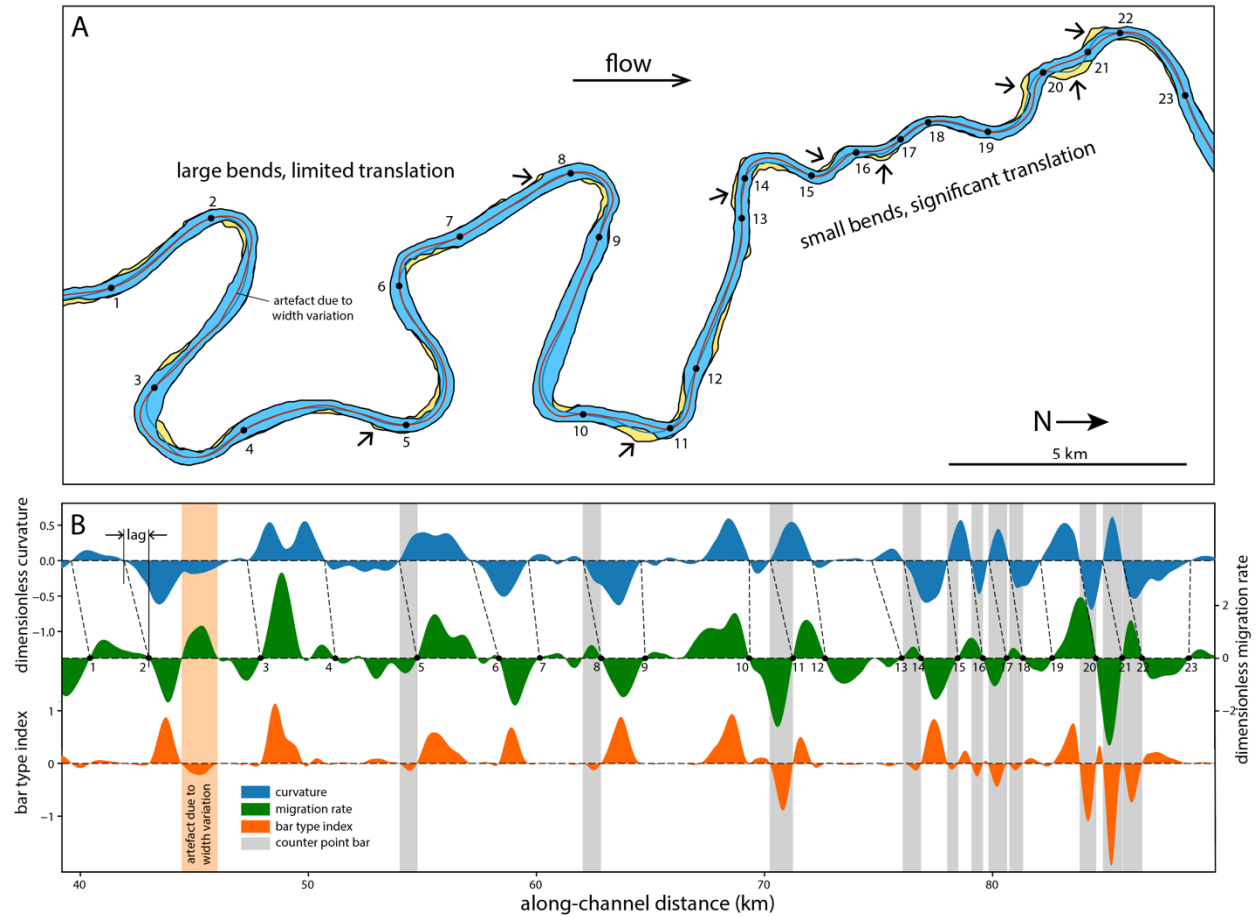

**Figure S2.** (A) Map of a segment of the Mamoré River in 1999. Yellow polygons show the locations of bar accretion between 1998 and 1999; blue centerline corresponds to 1998, and red centerline to 1999. Numbered zero-migration locations are shown as black dots and are the same as in (B). Arrows mark the counter-point bars. (B) Measured dimensionless curvatures, migration rates, and bar type indices along a segment of the Mamoré River (same as in (A)).
